# Supplementary material for: Diffusion probabilistic models enhance variational autoencoder for crystal structure generative modeling
Source: Springer Nature journal article supplement (doi:10.1038/s41598-024-51400-4), 2024-01-13
Supplement: 41598_2024_51400_MOESM1_ESM.pdf [file 41598_2024_51400_MOESM1_ESM.pdf]

# Supplementary Information: Diffusion probabilistic models enhance variational autoencoder for crystal structure generative modeling

Teerachote Pakornchote,<sup>1</sup> Natthaphon Choomphon-anomakhun,<sup>1</sup> Sorjrit Arrerut,<sup>1</sup> Chayanon Atthapak,<sup>1,2</sup> Sakarn Khamkao,<sup>1,2</sup> Thiparat Chotibut,<sup>3</sup> and Thiti Bovornratanaraks<sup>\*1,2</sup>

<sup>1</sup>*Extreme Conditions Physics Research Laboratory and Center of Excellence in Physics of Energy Materials (CE:PEM), Department of Physics, Faculty of Science, Chulalongkorn University, Bangkok 10330, Thailand*

<sup>2</sup>*Thailand Center of Excellence in Physics, Ministry of Higher Education, Science, Research and Innovation, 328 Si Ayutthaya Road, Bangkok 10400, Thailand*

<sup>3</sup>*Chula Intelligent and Complex Systems, Department of Physics, Faculty of Science, Chulalongkorn University, Bangkok 10330, Thailand*

(Dated: November 23, 2023)

## ENCODERS

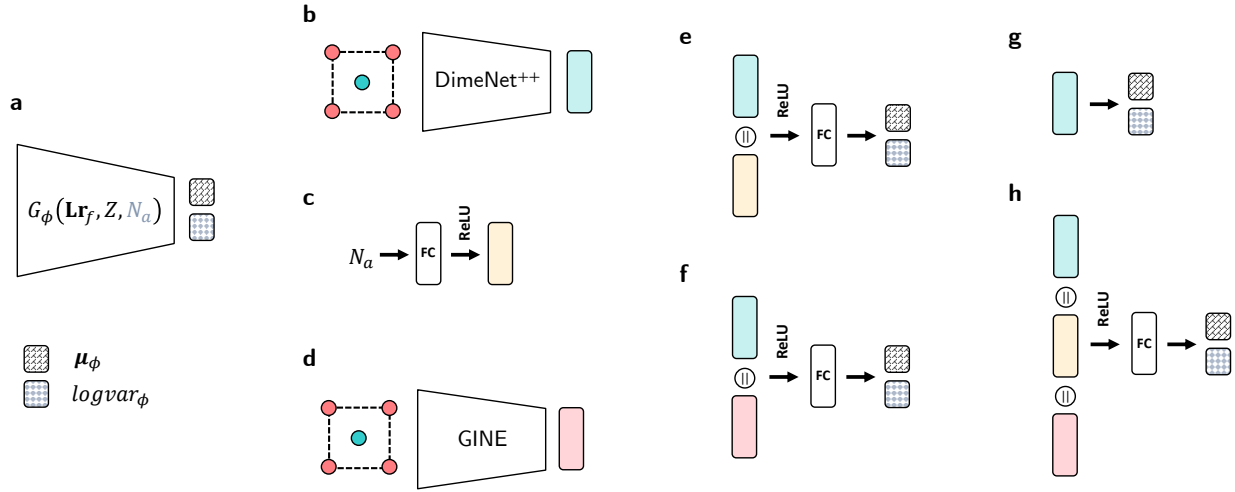

FIG. S1. (a) is the encoder for predicting  $\mu_\phi$  and  $\logvar_\phi$ . (b) and (d) are DimeNet<sup>++</sup> and GINE encoders, respectively, that take pristine crystal structures as inputs. (c) is the  $N_a$  encoder that takes the number of atoms  $N_a$  as input. (e), (f), (g), and (h) are encoders of DP-CDVAE+ $N_a$ , DP-CDVAE+GINE, DP-CDVAE, and DP-CDVAE+ $N_a$ +GINE models, respectively. Blue, yellow, and pink boxes are the latent features from (b), (c), and (d), respectively, and FC boxes are fully connected layers.

## MODEL EVALUATION

TABLE S1. Reconstruction performance using Eq. 6.

| Models                | Match rate (%) $\uparrow$ |           |       | $\langle \delta_{\text{rms}} \rangle$ $\downarrow$ |           |        |
|-----------------------|---------------------------|-----------|-------|----------------------------------------------------|-----------|--------|
|                       | Perov-5                   | Carbon-24 | MP-20 | Perov-5                                            | Carbon-24 | MP-20  |
| DP-CDVAE              | 68.72                     | 35.86     | 20.40 | 0.0177                                             | 0.2573    | 0.0715 |
| DP-CDVAE+ $N_a$       | 67.56                     | 38.13     | 21.71 | 0.0222                                             | 0.2719    | 0.0774 |
| DP-CDVAE+GINE         | 49.56                     | 35.27     | 19.98 | 0.0822                                             | 0.2683    | 0.0620 |
| DP-CDVAE+ $N_a$ +GINE | 64.12                     | 34.68     | 24.43 | 0.0250                                             | 0.3212    | 0.0697 |

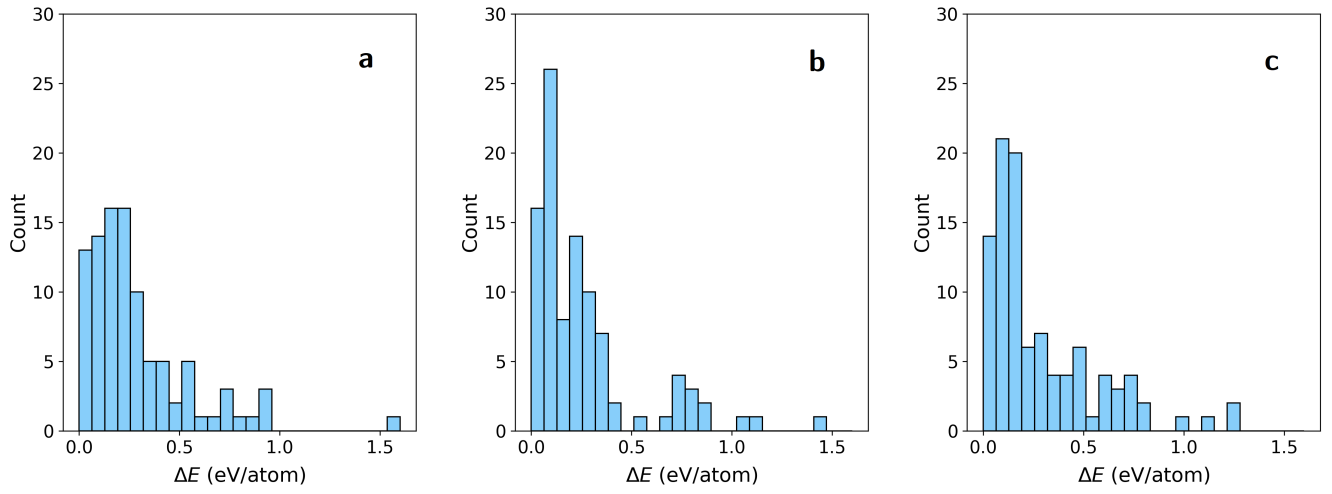

FIG. S2. Histograms of energy difference between generated and relaxed structures of (a) CDVAE, (b) CDVAE+Fourier, and (c) DP-CDVAE models. The modes (highest counting number) of CDVAE, CDVAE+Fourier, and DP-CDVAE models are 19.2 – 32.0, 68.0 – 128, and 64.0 – 128 eV/atom, respectively, where the bin size is 64.0 meV/atom.

## FOURIER FEATURES

We appended the Fourier features to the node attributes for the input of the diffusion network. The Fourier features are the concatenation of  $\sin(2^n \pi \mathbf{r}_t)$  and  $\cos(2^n \pi \mathbf{r}_t)$  where  $n \in \{n_{\min}, \dots, n_{\max}\}$ . For every DP-CDVAE model in the main text,  $n_{\min} = 3$  and  $n_{\max} = 8$ .

## LOSS FUNCTIONS

Similar to the original CDVAE, the total loss function to train the model consists of 5 sub-loss functions: the Kullback–Leibler divergence loss ( $\mathcal{L}_{KLD}$ ) for training  $\boldsymbol{\mu}_\phi$  and  $\log\text{var}_\phi$ , the lattice loss ( $\mathcal{L}_{latt}$ ) for training lattice parameters, the composition loss ( $\mathcal{L}_{comp}$ ) for training  $\mathbf{A}_z$ , the loss for training the number of atoms ( $\mathcal{L}_{N_a}$ ), and the loss from the diffusion network ( $\mathcal{L}_{diff}$ ) for training  $\boldsymbol{\epsilon}_\theta$  and  $\mathbf{A}_\theta$ . In particular, the total loss is

$$\mathcal{L} = \mathcal{L}_{diff} + \lambda_1 \mathcal{L}_{KLD} + \lambda_2 \mathcal{L}_{latt} + \lambda_3 \mathcal{L}_{comp} + \lambda_4 \mathcal{L}_{N_a}, \quad (\text{S1})$$

where  $\lambda_1$ ,  $\lambda_2$ ,  $\lambda_3$ , and  $\lambda_4$  are tunable loss scaling factors,  $\mathcal{L}_{latt}$  is computed from the mean square error of lattice parameters, and  $\mathcal{L}_{comp}$  and  $\mathcal{L}_{N_a}$  are cross-entropy losses.

- 
- [1] R. J. Needs and C. J. Pickard, Perspective: Role of structure prediction in materials discovery and design, *APL Materials* **4**, 053210 (2016).
- [2] W. Kohn and L. J. Sham, *Phys. Rev.* **140**, A1133 (1965).
- [3] A. R. Oganov and C. W. Glass, Crystal structure prediction using ab initio evolutionary techniques: Principles and applications, *The Journal of Chemical Physics* **124**, 244704 (2006).
- [4] Y. Wang, J. Lv, L. Zhu, and Y. Ma, Crystal structure prediction via particle-swarm optimization, *Phys. Rev. B* **82**, 094116 (2010).
- [5] A. R. Oganov, C. J. Pickard, Q. Zhu, and R. J. Needs, Structure prediction drives materials discovery, *Nature Reviews Materials* **4**, 331 (2019).
- [6] J. C. Schön, K. Doll, and M. Jansen, Predicting solid compounds via global exploration of the energy landscape of solids on the ab initio level without recourse to experimental information, *physica status solidi (b)* **247**, 23 (2010).
- [7] E. V. Podryabinkin, E. V. Tikhonov, A. V. Shapeev, and A. R. Oganov, Accelerating crystal structure prediction by machine-learning interatomic potentials with active learning, *Phys. Rev. B* **99**, 064114 (2019).
- [8] C. J. Pickard and R. J. Needs, Ab initio random structure searching, *Journal of Physics: Condensed Matter* **23**, 053201 (2011).
- [9] C. Shi, S. Luo, M. Xu, and J. Tang, Learning gradient fields for molecular conformation generation, in *Proceedings of the 38th International Conference on Machine Learning*, Proceedings of Machine Learning Research, Vol. 139, edited by M. Meila and T. Zhang (PMLR, 2021) pp. 9558–9568.
- [10] T. Xie, X. Fu, O.-E. Ganea, R. Barzilay, and T. S. Jaakkola, Crystal diffusion variational autoencoder for periodic material generation, in *International Conference on Learning Representations* (2022).
- [11] M. Xu, L. Yu, Y. Song, C. Shi, S. Ermon, and J. Tang, Geodiff: A geometric diffusion model for molecular conformation generation, in *International Conference on Learning Representations* (2022).
- [12] J. Guan, W. W. Qian, X. Peng, Y. Su, J. Peng, and J. Ma, 3d equivariant diffusion for target-aware molecule generation and affinity prediction, in *The Eleventh International Conference on Learning Representations* (2023).
- [13] Y. Song and S. Ermon, Generative modeling by estimating gradients of the data distribution, in *Advances in Neural Information Processing Systems*, Vol. 32, edited by H. Wallach, H. Larochelle, A. Beygelzimer, F. d'Alché-Buc, E. Fox, and R. Garnett (Curran Associates, Inc., 2019).
- [14] Y. Song, J. Sohl-Dickstein, D. P. Kingma, A. Kumar, S. Ermon, and B. Poole, Score-based generative modeling through stochastic differential equations, in *International Conference on Learning Representations* (2021).
- [15] D. P. Kingma and M. Welling, Auto-encoding variational bayes, in *International Conference on Learning Representations* (2014).
- [16] J. Ho, A. Jain, and P. Abbeel, Denoising diffusion probabilistic models, in *Advances in Neural Information Processing Systems*, Vol. 33, edited by H. Larochelle, M. Ranzato, R. Hadsell, M. Balcan, and H. Lin (Curran Associates, Inc., 2020) pp. 6840–6851.
- [17] R. Jiao, W. Huang, P. Lin, J. Han, P. Chen, Y. Lu, and Y. Liu, Crystal structure prediction by joint equivariant diffusion on lattices and fractional coordinates, in *Workshop on "Machine Learning for Materials" ICLR 2023* (2023).
- [18] S. Kang and K. Cho, Conditional molecular design with deep generative models, *Journal of Chemical Information and Modeling* **59**, 43 (2019), pMID: 30016587.
- [19] J. Lim, S. Ryu, J. W. Kim, and W. Y. Kim, Molecular generative model based on conditional variational autoencoder for de novo molecular design, *Journal of Cheminformatics* **10**, 31 (2018).

- [20] Y. Song, L. Shen, L. Xing, and S. Ermon, Solving inverse problems in medical imaging with score-based generative models, in *International Conference on Learning Representations* (2022).
- [21] M. R. Carbone, M. Topsakal, D. Lu, and S. Yoo, Machine-learning x-ray absorption spectra to quantitative accuracy, *Phys. Rev. Lett.* **124**, 156401 (2020).
- [22] Z. Liang, M. R. Carbone, W. Chen, F. Meng, E. Stavitski, D. Lu, M. S. Hybertsen, and X. Qu, Decoding structure-spectrum relationships with physically organized latent spaces, *Phys. Rev. Mater.* **7**, 053802 (2023).
- [23] A. Cui, K. Jiang, M. Jiang, L. Shang, L. Zhu, Z. Hu, G. Xu, and J. Chu, Decoding phases of matter by machine-learning raman spectroscopy, *Phys. Rev. Appl.* **12**, 054049 (2019).
- [24] A. Okhotin, D. Molchanov, V. Arkhipkin, G. Bartosh, A. Alanov, and D. Vetrov, Star-shaped denoising diffusion probabilistic models (2023), arXiv:2302.05259 [stat.ML].
- [25] M. M. Bronstein, J. Bruna, T. Cohen, and P. Velickovic, Geometric deep learning: Grids, groups, graphs, geodesics, and gauges, *CoRR* **abs/2104.13478** (2021), 2104.13478.
- [26] T. S. Cohen, M. Geiger, J. Köhler, and M. Welling, Spherical CNNs, in *International Conference on Learning Representations* (2018).
- [27] N. Thomas, T. Smidt, S. Kearnes, L. Yang, L. Li, K. Kohlhoff, and P. Riley, Tensor field networks: Rotation- and translation-equivariant neural networks for 3d point clouds (2018).
- [28] Z. Ren, S. I. P. Tian, J. Noh, F. Oviedo, G. Xing, J. Li, Q. Liang, R. Zhu, A. G. Aberle, S. Sun, X. Wang, Y. Liu, Q. Li, S. Jayavelu, K. Hippalgaonkar, Y. Jung, and T. Buonassisi, An invertible crystallographic representation for general inverse design of inorganic crystals with targeted properties, *Matter* **5**, 314 (2022).
- [29] J. Gastegger, J. Groß, and S. Günnemann, Directional message passing for molecular graphs, in *International Conference on Learning Representations* (2020).
- [30] J. Gastegger, S. Giri, J. T. Margraf, and S. Günnemann, Fast and uncertainty-aware directional message passing for non-equilibrium molecules (2022), arXiv:2011.14115 [cs.LG].
- [31] K. Xu, W. Hu, J. Leskovec, and S. Jegelka, How powerful are graph neural networks?, in *International Conference on Learning Representations* (2019).
- [32] W. Hu\*, B. Liu\*, J. Gomes, M. Zitnik, P. Liang, V. Pande, and J. Leskovec, Strategies for pre-training graph neural networks, in *International Conference on Learning Representations* (2020).
- [33] K. Schütt, P.-J. Kindermans, H. E. Sauceda Felix, S. Chmiela, A. Tkatchenko, and K.-R. Müller, SchNet: A continuous-filter convolutional neural network for modeling quantum interactions, in *Advances in Neural Information Processing Systems*, Vol. 30, edited by I. Guyon, U. V. Luxburg, S. Bengio, H. Wallach, R. Fergus, S. Vishwanathan, and R. Garnett (Curran Associates, Inc., 2017).
- [34] J. Klicpera, F. Becker, and S. Günnemann, Gemnet: Universal directional graph neural networks for molecules, in *Advances in Neural Information Processing Systems*, edited by A. Beygelzimer, Y. Dauphin, P. Liang, and J. W. Vaughan (2021).
- [35] D. P. Kingma, T. Salimans, B. Poole, and J. Ho, On density estimation with diffusion models, in *Advances in Neural Information Processing Systems*, edited by A. Beygelzimer, Y. Dauphin, P. Liang, and J. W. Vaughan (2021).
- [36] R. W. Grosse-Kunstleve, N. K. Sauter, and P. D. Adams, Numerically stable algorithms for the computation of reduced unit cells, *Acta Crystallographica Section A* **60**, 1 (2004).
- [37] I. E. Castelli, D. D. Landis, K. S. Thygesen, S. Dahl, I. Chorkendorff, T. F. Jaramillo, and K. W. Jacobsen, New cubic perovskites for one-and two-photon water splitting using the computational materials repository, *Energy & Environmental Science* **5**, 9034 (2012).
- [38] I. E. Castelli, T. Olsen, S. Datta, D. D. Landis, S. Dahl, K. S. Thygesen, and K. W. Jacobsen, Computational screening of perovskite metal oxides for optimal solar light capture, *Energy & Environmental Science* **5**, 5814 (2012).
- [39] A. Jain, S. P. Ong, G. Hautier, W. Chen, W. D. Richards, S. Dacek, S. Cholia, D. Gunter, D. Skinner, G. Ceder, *et al.*, Commentary: The materials project: A materials genome approach to accelerating materials innovation, *APL materials* **1**, 011002 (2013).
- [40] C. J. Pickard,.
- [41] C. K. Joshi, C. Bodnar, S. V. Mathis, T. Cohen, and P. Lio, On the expressive power of geometric graph neural networks (2023).
- [42] Y. Wu, P. Lazic, G. Hautier, K. Persson, and G. Ceder, First principles high throughput screening of oxynitrides for water-splitting photocatalysts, *Energy Environ. Sci.* **6**, 157 (2013).
- [43] T. Ishikawa and T. Miyake, Evolutionary construction of a formation-energy convex hull: Practical scheme and application to a carbon-hydrogen binary system, *Phys. Rev. B* **101**, 214106 (2020).
- [44] A. Ektarawong, E. Johansson, T. Pakornchote, T. Bovornratanaraks, and B. Alling, Boron vacancy-driven thermodynamic stabilization and improved mechanical properties of alb2-type tantalum diborides as revealed by first-principles calculations, *Journal of Physics: Materials* **6**, 025002 (2023).
- [45] B. Gruber, The relationship between reduced cells in a general Bravais lattice, *Acta Crystallographica Section A* **29**, 433 (1973).
- [46] I. Krivý and B. Gruber, A unified algorithm for determining the reduced (Niggli) cell, *Acta Crystallographica Section A* **32**, 297 (1976).
- [47] A. Q. Nichol and P. Dhariwal, Improved denoising diffusion probabilistic models, in *Proceedings of the 38th International Conference on Machine Learning*, Proceedings of Machine Learning Research, Vol. 139, edited by M. Meila and T. Zhang (PMLR, 2021) pp. 8162–8171.
- [48] P. E. Blöchl, *Phys. Rev. B* **50**, 17953 (1994).
- [49] G. Kresse and J. Furthmüller, *Computat. Mater. Sci.* **6**, 15 (1996).

- [50] G. Kresse and J. Furthmüller, Phys. Rev. B **54**, 11169 (1996).
- [51] J. P. Perdew, K. Burke, and M. Ernzerhof, Phys. Rev. Lett. **77**, 3865 (1996).
- [52] H. J. Monkhorst and J. D. Pack, Phys. Rev. B **13**, 5188 (1976).
- [53] J. D. Pack and H. J. Monkhorst, Phys. Rev. B **16**, 1748 (1977).
